# Supplementary material
Source: PubMed Central journal article supplement (PMC3488093)
Supplement: supp_M112.414391_jbc.M112.414391-1.pdf [file supp_M112.414391_jbc.M112.414391-1.pdf]

# Supplemental Information

## Methods

### Fluorescence-based Kinase Inhibitor Binding Assay

Kinase inhibitors were dissolved in 100% DMSO to make 10 mM stock solutions. Stock solutions were further diluted to 10  $\mu\text{M}$  with degassed and Argon-aerated assay buffer containing 20 mM Tris pH 8.0, 0.5% glycerol, 250 mM NaCl and 1 mM DTT. The purified EGFR kinase (kindly provided by Drs. Cai-hong Yun and Michael J. Eck, Dana-Farber Cancer Institute, Boston, MA) was diluted to 200 nM with the same assay buffer supplemented with 0.1% DMSO to match the DMSO concentration in inhibitor solutions. To kinase solution (2.5 ml) in a 1.0 cm quartz cuvette with a micro stir bar, 5  $\mu\text{l}$  of inhibitor was added every 30 seconds. Tryptophan fluorescence was monitored with a Perkin Elmer LS-55 fluorescence spectrometer at excitation wavelength of 280 nm and emission wavelength of 341 nm. Experimental data were fit to

$$\Delta F = \frac{A}{1 + \frac{K_d}{[I]}} - B[I]$$

Where,  $[I] = \frac{-([E_t] - [I_t] + K_d) + \sqrt{([E_t] - [I_t] + K_d)^2 + 4K_d[I_t]}}{2}$

$\Delta F$  is the change of fluorescent intensity. A and B are constant parameters.  $K_d$  is the dissociation constant, while  $[I]$ ,  $[E_t]$ , and  $[I_t]$  are the free inhibitor concentration, the total kinase concentration, and the total inhibitor concentration, respectively.

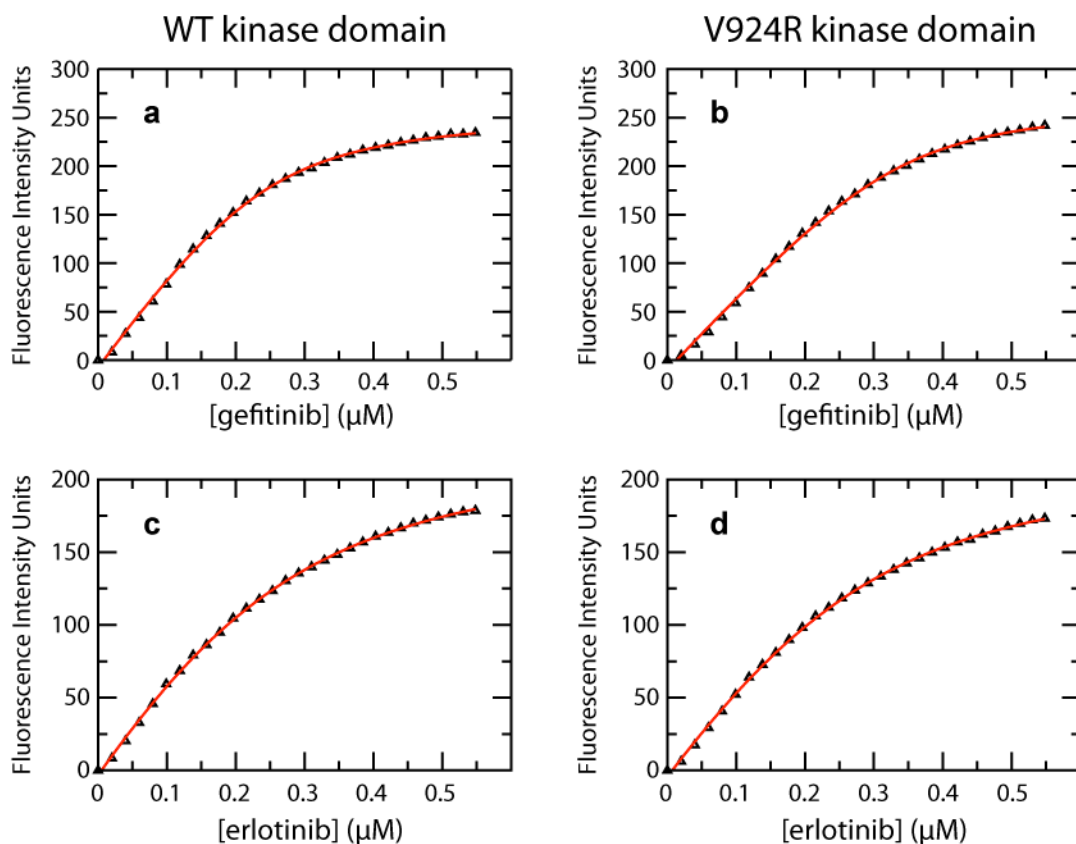

**Supplemental Figure S1.** Kinase inhibitor binding to EGFR kinase domain. (a,b) The binding of gefitinib to EGFR wt (a) or V924R mutant (b) kinase domain measured with a fluorescence-based assay. (c,d) The binding of erlotinib to EGFR wt (c) or V924R mutant (d) kinase domain measured with the same assay. The binding curves were fit with the equations shown above.

**a**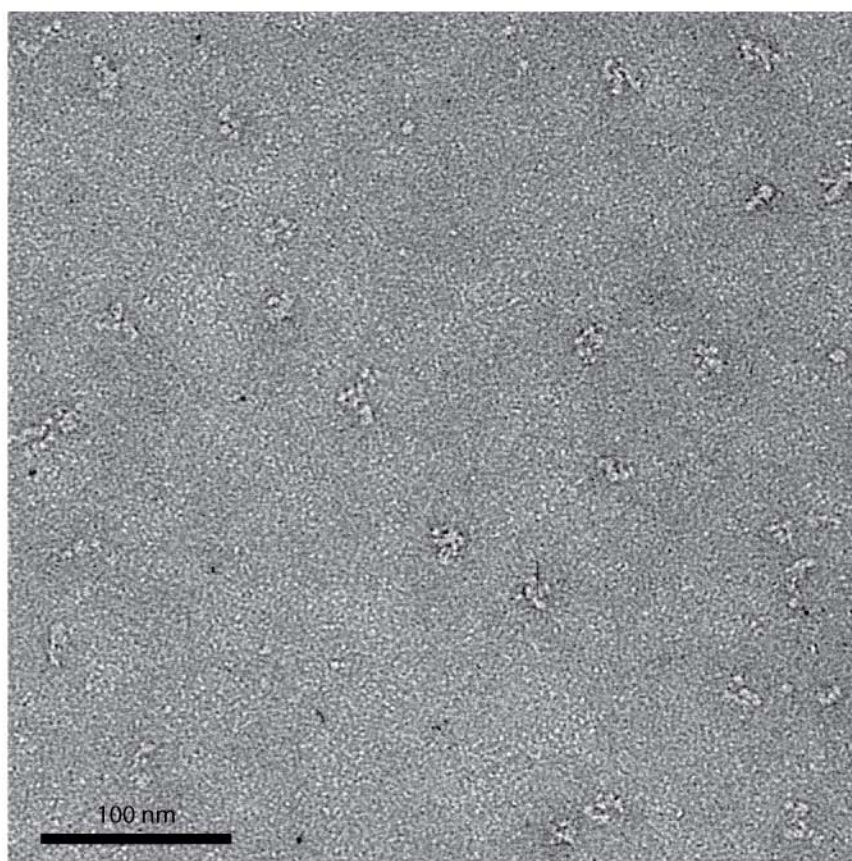**b** 5,841 particles in 50 classes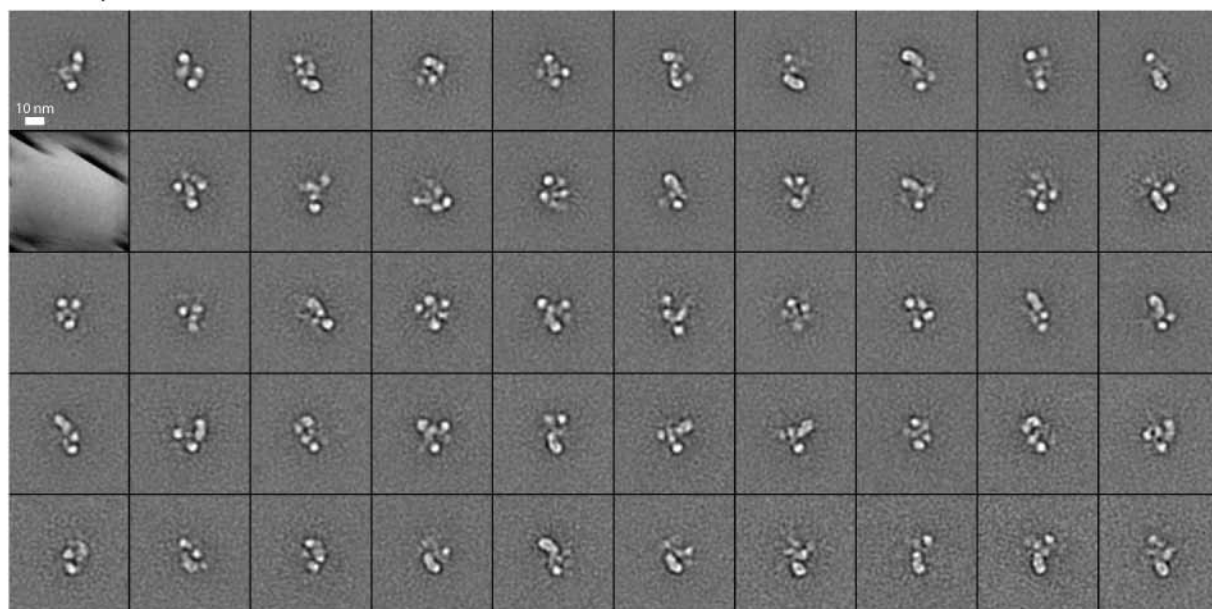

**Supplemental Figure S2.** EGFR  $\Delta 998$  in complex with PD168393. Representative micrograph area (a) and class averages (b). Averages are ranked (left to right in each row, from top to bottom row) by numbers of particles in each class.

**a**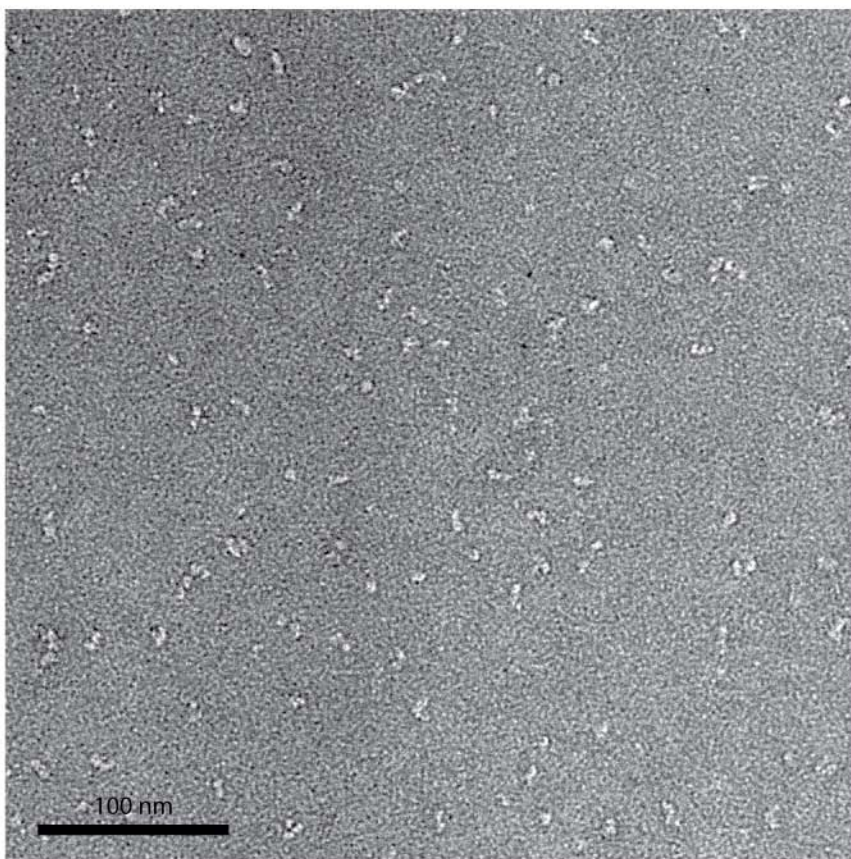**b** 5,392 particles in 50 classes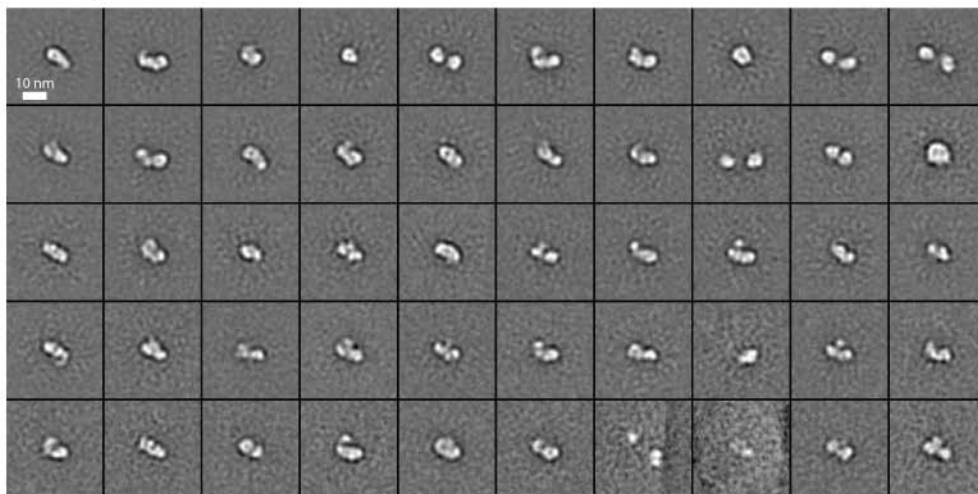

**Supplemental Figure S3.** EGFR  $\Delta$ ecto $\Delta$ 998 in complex with PD168393. Representative micrograph area (a) and class averages (b). Averages are ranked (left to right in each row, from top to bottom row) by numbers of particles in each class.

**a**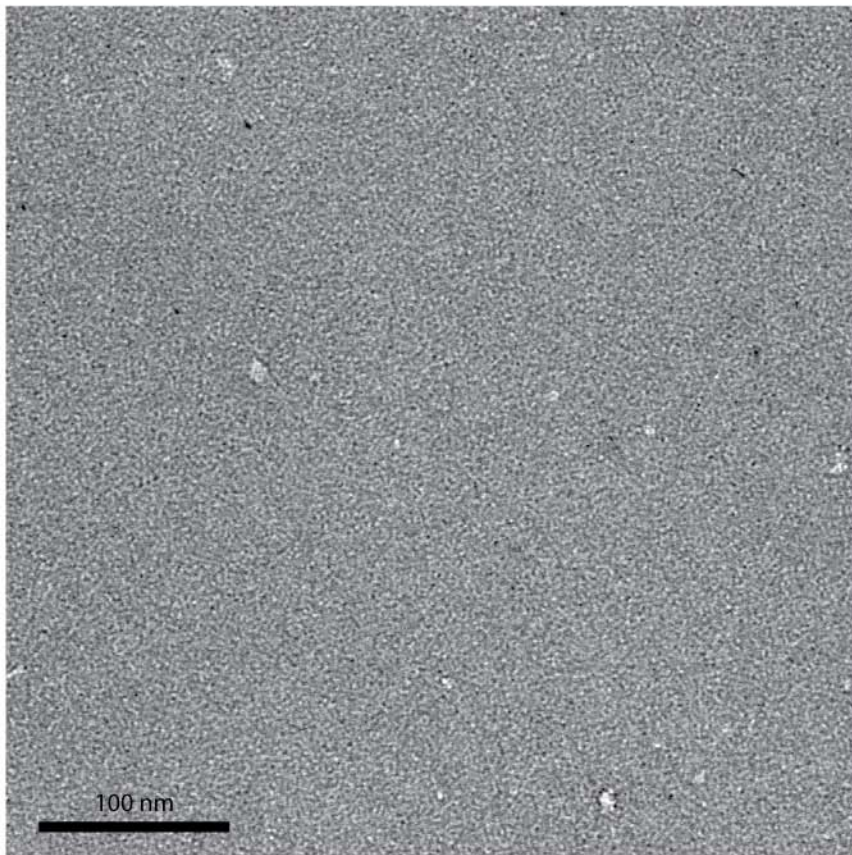**b** 2,686 particles in 50 classes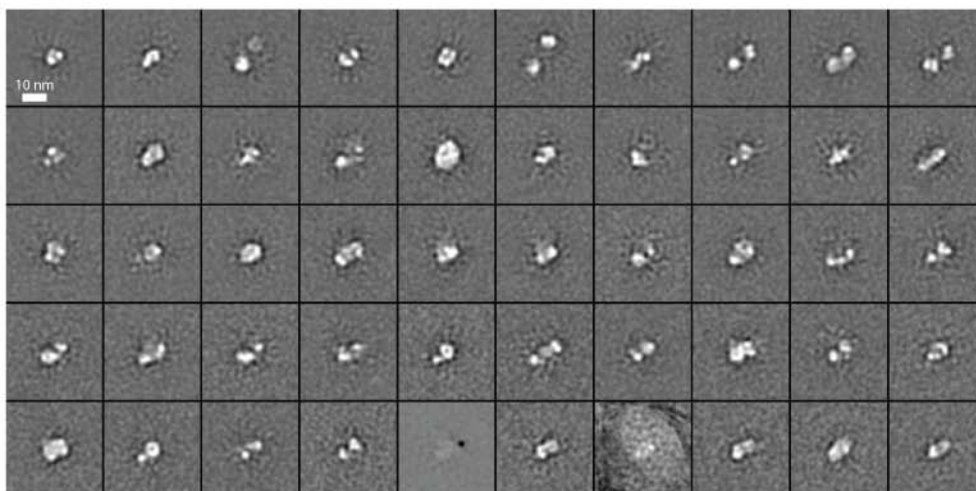

**Supplemental Figure S4.** EGFR  $\Delta$ ecto $\Delta$ 998. Representative micrograph area (a) and class averages (b). Averages are ranked (left to right in each row, from top to bottom row) by numbers of particles in each class.

**a**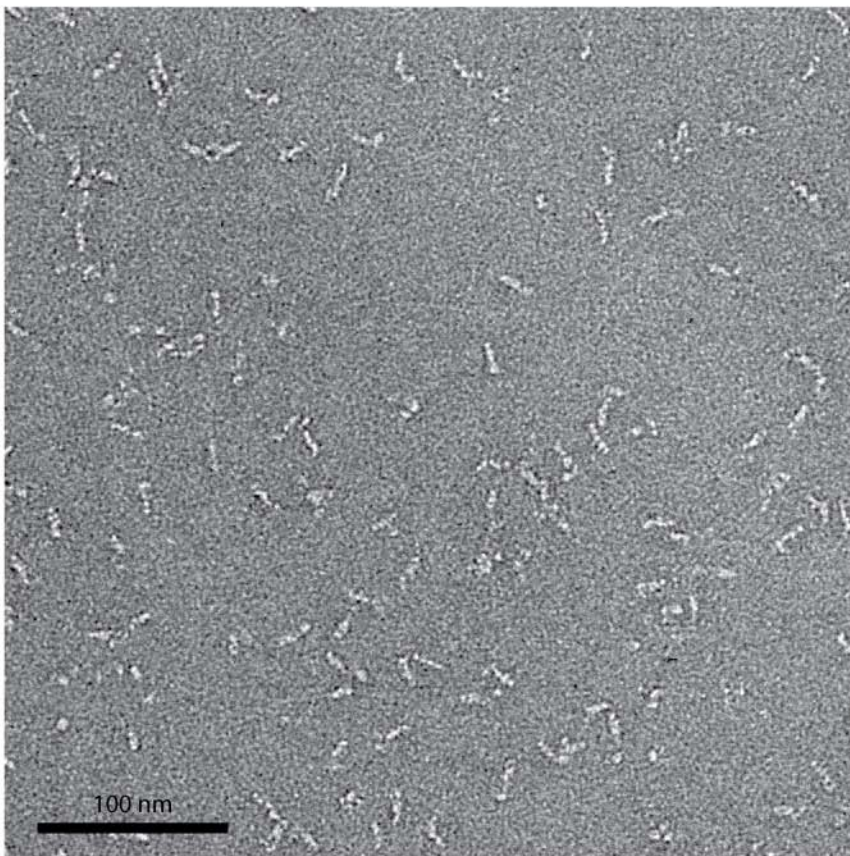**b** 8,439 particles in 50 classes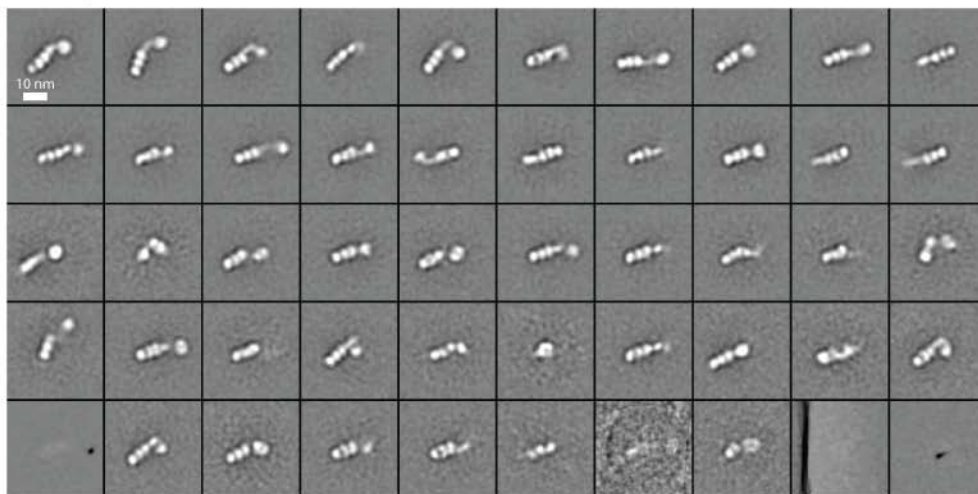

**Supplemental Figure S5.** EGFR (de 2-7)  $\Delta$ 998 in complex with cetuximab Fab. Representative micrograph area (a) and class averages (b). Averages are ranked (left to right in each row, from top to bottom row) by numbers of particles in each class.

**a**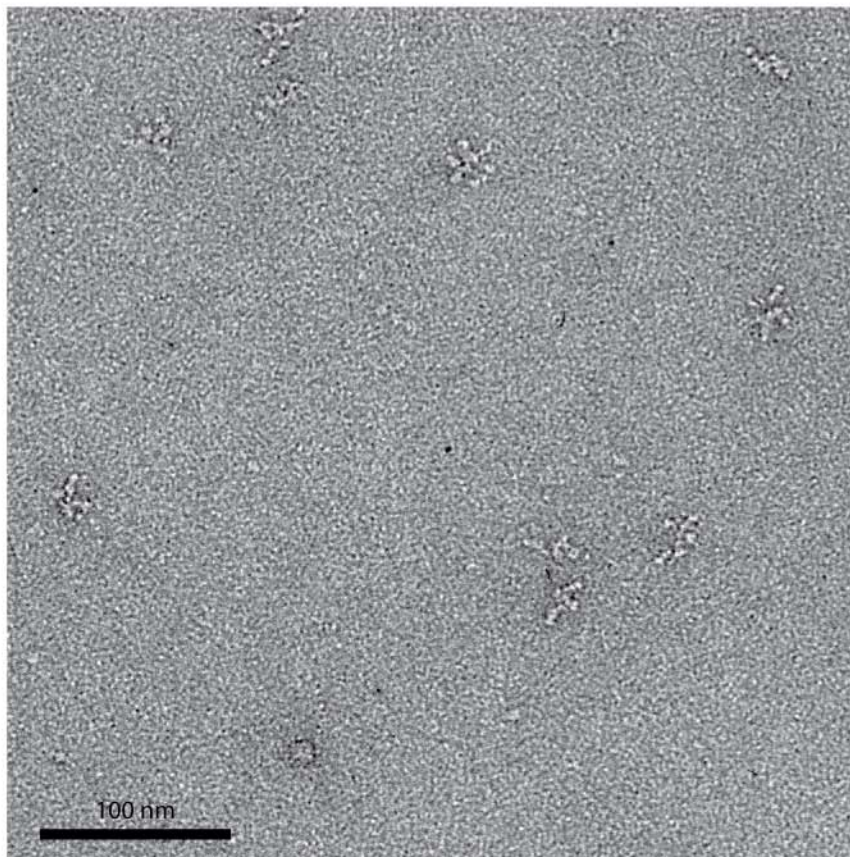**b** 5,028 particles in 50 classes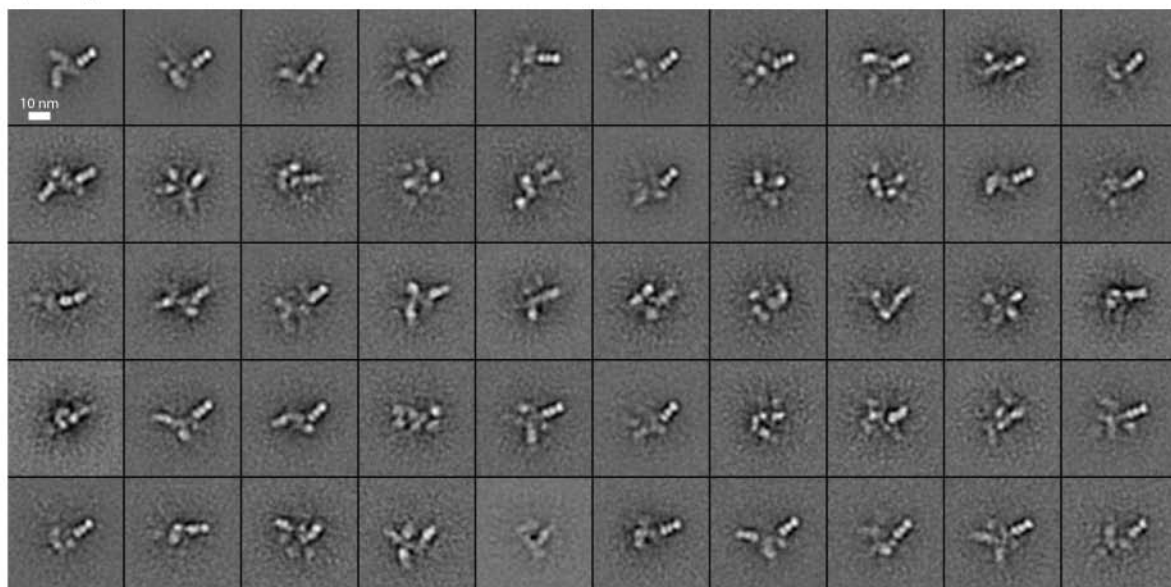

**Supplemental Figure S6.** EGFR  $\Delta 998$  in complex with PD168393 and cetuximab Fab. Representative micrograph area (a) and class averages (b). Averages are ranked (left to right in each row, from top to bottom row) by numbers of particles in each class.
